# Supplementary material
Source: HighWire-hosted journal article supplement (https://rc.rcjournal.com/highwire/filestream/23027/field_highwire_adjunct_files/1/rc-09772-File002.pdf)
Supplement: rc-09772-File002.pdf [file rc-09772-File002.pdf]

## PREDICTORS OF RESPIRATORY SUPPORT IN THE ED FOR COVID-19

Appendix Table 1. Association Between Site and of Choice of Respiratory Support Strategies: Results From a Multivariable Logistic Regression Model Controlling for Patient and System-Level Predictors

| Covariate                                                                                                                                   | Choice of Respiratory Support Strategies<br>(Reference = low-flow oxygen<br>[NC or NRB]) | OR   | 95% CI    | <i>P</i> |
|---------------------------------------------------------------------------------------------------------------------------------------------|------------------------------------------------------------------------------------------|------|-----------|----------|
| <b>Site</b>                                                                                                                                 |                                                                                          |      |           |          |
| (Reference = Site 1)                                                                                                                        |                                                                                          |      |           |          |
| Site 2                                                                                                                                      | Only NIV, HFNC, or both                                                                  | 1.16 | 0.47–2.85 | .75      |
|                                                                                                                                             | Only invasive ventilation                                                                | 0.64 | 0.22–1.87 | .42      |
|                                                                                                                                             | NIV/HFNC followed by invasive ventilation                                                | 0.22 | 0.02–2.09 | .19      |
| Site 3                                                                                                                                      | Only NIV, HFNC, or both                                                                  | 2.47 | 1.25–4.89 | .01      |
|                                                                                                                                             | Only invasive ventilation                                                                | 0.44 | 0.12–1.66 | .23      |
|                                                                                                                                             | NIV/HFNC followed by invasive ventilation                                                | 0.44 | 0.14–1.38 | .16      |
| Site 4                                                                                                                                      | Only NIV, HFNC, or both                                                                  | 3.72 | 1.79–7.70 | .0004    |
|                                                                                                                                             | Only invasive ventilation                                                                | 0.77 | 0.27–2.18 | .63      |
|                                                                                                                                             | NIV/HFNC followed by invasive ventilation                                                | 0.99 | 0.30–3.29 | .98      |
| Site 5                                                                                                                                      | Only NIV, HFNC, or both                                                                  | 1.08 | 0.47–2.45 | .86      |
|                                                                                                                                             | Only invasive ventilation                                                                | 1.03 | 0.39–2.73 | .96      |
|                                                                                                                                             | NIV/HFNC followed by invasive ventilation                                                | 0.64 | 0.19–2.16 | .47      |
| <hr/> NC = nasal cannula<br>NRB = non-rebreather mask<br>OR = odds ratio<br>NIV = noninvasive ventilation<br>HFNC = high-flow nasal cannula |                                                                                          |      |           |          |
